1 **Title:** SimBit: A high performance, flexible and easy-to-use population

2 genetic simulator

3

4 **Author:** Remi Matthey-Doret<sup>1,2</sup>

5 1: Department of Zoology and Biodiversity Research Centre, University of British Columbia,

6 Vancouver, British Columbia V6T 1Z4, Canada

7 2: Institute of Ecology and Evolution, University of Bern, CH-3012 Bern, Switzerland

8

9 **Corresponding author:** [remi.matthey-doret@iee.unibe.ch](mailto:remi.matthey-doret@iee.unibe.ch)

10 **Abstract**

11 SimBit is a general purpose and high performance forward-in-time population genetics simulator.  
12 SimBit has been designed to be able to model a wide diversity of complex scenarios from a simple  
13 set of commands that are very flexible. SimBit also comes with a R wrapper that simplifies the  
14 management of an entire research project from the creation of a grid of parameters and  
15 corresponding inputs, running simulations and gathering outputs for analysis. Implementing  
16 various representations of the individual's genotype allows SimBit to sustain a high performance  
17 in a wide diversity of simulation scenarios. SimBit's performance was extensively benchmarked  
18 in comparison to SLiM, Nemo and SFS\_CODE. No single program systematically outperforms  
19 the others but SimBit is most often the highest performing program and maintains high  
20 performance in all scenarios considered.

## 21 **Introduction**

22 Evolutionary genetics has always had a strong theoretical background. As our understanding of  
23 ecological and evolutionary processes improves, we study more and more complex processes for  
24 which mathematical modelling becomes very tedious if not impossible. For such processes, only  
25 numerical simulations can allow us to perform realistic modelling. In fact, to my knowledge, the  
26 first work in computational biology has been conducted by one of the fathers of population  
27 genetics, Ronald A. Fisher (1950).

28 We are today in an uncanny valley in which we are almost able to perform realistic genome-wide  
29 simulations of populations but not quite yet. Individual-based simulations are used to investigate  
30 phenomena in evolutionary biology and ecology (e.g. Gilbert et al., 2017; Yeaman & Whitlock,  
31 2011), to question conservation scenarios (e.g. Cowley, 2008; Halls & Welcomme, 2004) and are  
32 also used in statistical settings such as with Approximate Bayesian Computation (reviewed in  
33 Beaumont, 2010) or with a machine learning algorithm (e.g. Schrider & Kern, 2018). However,  
34 such technics are often computationally very expensive and it can take a lot of time to parametrize  
35 these simulations. As a consequence, many studies limit forward simulations to unrealistically low  
36 number of individuals or loci.

37 Writing an algorithm to make efficient individual-based simulations is no easy task, and most  
38 authors therefore rely on existing, flexible simulation programs. It is often difficult, however, to  
39 choose a simulation program. There are no objective ways to compare and express how user-  
40 friendly a program is. Also, different program packages have drastically different performance for  
41 different simulation scenarios. Learning how to use a new program can be a lengthy and difficult  
42 task, therefore many users just use the program they already know or just pick one program that is  
43 able to perform the simulations they need without questioning its performance. However, as shown

44 below, even under simple scenarios, a given program can be hundreds or thousands of times slower  
45 than another one which will drastically affect the feasibility, or level of replication, of a study.  
46 Here, I present SimBit, a general purpose forward-in-time population genetics simulator written  
47 in C++. SimBit has been designed to have a high performance for a wide variety of simulation  
48 scenarios. SimBit does so by using diverse representations of the genetic architecture for different  
49 simulation scenarios. As a user of Nemo (Guillaume & Rougemont, 2006), SFS\_CODE  
50 (Hernandez, 2008; Hernandez & Uricchio, 2015) and SLiM (Haller et al., 2019; Haller & Messer,  
51 2017, 2019), I gathered my experience to make SimBit a program that offers a fast learning curve  
52 to new users. With a simple set of commands that are very flexible, users can quickly simulate a  
53 great diversity of scenarios. SimBit can simulate a wide variety of selection scenarios (any  
54 selection coefficient and dominance coefficient at any locus, any epistatic interaction with any  
55 number of loci, any spatial and temporal changes of selection scenarios, etc.), demographic  
56 scenarios (any number of discrete patches with specific migration scenario, hard vs. soft selection,  
57 changes in patch size depending on fecundity, exponential vs logistic growth, gametic or zygotic  
58 dispersion, etc.), mating systems (any cloning rate and selfing rate, hermaphrodites or males and  
59 females), different types of representation of the genetic architecture (bi-allelic loci, QTLs, etc.)  
60 and SimBit has a great diversity of tools to manipulate simulations and gather output. Finally,  
61 SimBit comes with a R wrapper that is very handy for managing the creation of numerous input  
62 commands. This article aims at presenting the general working of SimBit and compares its  
63 performance to other similar programs. For detailed information about how to use SimBit, please  
64 consult the manual.

65

66

## 67 **Demography and species ecologies**

68 In the current version, SimBit assumes non-overlapping generations (although different species  
69 can have different generation times), diploidy (although one can mimic haploidy), and assumes  
70 discrete patches (although patches can be made arbitrarily small, essentially mimicking continuous  
71 space). Outside of these three assumptions, SimBit can simulate very diverse types of scenarios.  
72 SimBit can simulate any number of patches with any migration matrix, carrying capacity, variation  
73 of the patch size from the carrying capacity based on realized fecundity with exponential or logistic  
74 growth model (the growth model can be set for each patch independently; see more on that below).  
75 Each patch can be initialized at the desired size and all of the above parameters can vary over time.  
76 Dispersal can happen at the gametic or at the zygotic phase and may be a function of the patch  
77 mean fitness (hard versus soft selection). SimBit can also simulate multiple species and their  
78 ecological interactions as explained below.

79  
80 SimBit can simulate realistic changes in population in response to patch mean fitnesses. Let's  
81 denote at time  $t$  the expected number of offspring of a species  $s$  produced in patch  $p$  as  $\overline{P}_{t,s,p}$ . Let's  
82 also denote the patch growth rate  $r_{t,s,p} = f \sum w_i$  as the product of  $f$ , the theoretical maximum  
83 fecundity of an individual having a (relative) fitness of 1.0 (set by the user), and  $\sum w_i$ , the sum of  
84 fitnesses in this patch. If the user allows the patch size to vary from the carrying capacity of this  
85 species and that at time  $t$ , in patch  $p$ , for species  $s$ , the carrying capacity is set to  $K_{t,s,p}$  then the  
86 expected number of offspring produced is  $\overline{P}_{t,s,p} = rN_{t,s,p}$  for the exponential model and  $\overline{P}_{t,s,p} =$   
87  $N_{t,s,p} + rN_{t,s,p} \left(1 - \frac{N_{t,s,p}}{K_{t,s,p}}\right)$  for the logistic model, where  $N_{t,s,p}$  is the size of the patch  $p$  of species  
88  $s$  at time  $t$ . The actual number of offspring produced,  $P_{t,s,p}$  can then either be set deterministically  
89 ( $P_{t,s,p} = \overline{P}_{t,s,p}$ ) or stochastically ( $P_{t,s,p} = \text{Poisson}(\overline{P}_{t,s,p})$ ). With more than one patch, these

90 offspring produced are then spread out through migration. With a single patch (or in absence of  
91 immigration and emigration for the patch  $p$ ),  $N_{t+1,s,p}$  is simply set to  $P_{t,s,p}$ .

92  
93 Into the above framework, we can add the fact that different species can affect each other's through  
94 their ecological relationships. This can be achieved through a “competition matrix” that  
95 implements a Lotka-Volterra model of competition and/or through a “predation matrix” that  
96 implements a consumer-resource model (or predator-prey model) with a linear rate of resource  
97 consumption (introduction to these models in Otto & Day, 2007; discrete-time example of a  
98 predator-prey model in Çelik & Duman, 2009). Let  $\alpha_{i,s}$  be an element of the “competition matrix”  
99 describing the competitive effect of species  $i$  on focal species  $s$ . The expected number of offspring

100 produced is then given by  $\overline{P}_{t,s,p} = N_{t,s,p} + rN_{t,s,p} \left(1 - \frac{\sum_i \alpha_{i,s} N_{t,i,p}}{K_{t,s,p}}\right)$ . Note that competitive effects

101 can only be set on species and on patches having logistic growth. Let  $\beta_{i,s}$  be an element of the  
102 “predation matrix” describing the effect of species  $i$  on species  $s$ . The predation effect is added to

103 the expected number of offspring produced  $\overline{P}'_{t,s,p} = \overline{P}_{t,s,p} + \sum_i \beta_{i,s}$ . In this last equation, I

104 assumed that all effects  $\beta_{i,s}$  are independent of the patch sizes of both the causal and recipient

105 species but in practice a user can specify for each  $\beta_{i,s}$  whether the effect should be multiplied by

106 the causal species patch size ( $N_{t,i,p}$ ), by the recipient species patch size ( $N_{t,s,p}$ ) or by both. SimBit

107 enforces that all the diagonal values  $\alpha_{s,s} = 1.0$  and that all the diagonal values  $\beta_{s,s} = 0.0$ . SimBit

108 can also allow the patch size to overshoot the carrying capacity  $K_{t,s,p}$  up to an arbitrary large value

109 allowing for oscillating or chaotic changes in patch sizes.

110

111

112

## 113 **Mating system**

114 SimBit can simulate hermaphrodites or males and females with an arbitrary sex-ratio. At every  
115 reproduction event, an organism will be cloned with probability  $C$  and self with probability  $S$ . By  
116 default, the cloning rate is set at 0.0 and the selfing rate is set at  $1/2N$  (Wright-Fisher model), but  
117 these can be set by the user.

118

## 119 **Types of loci and selection**

120 Different programs use different representations of the genetic variation. For example, Nemo  
121 represents an individual's haplotype with an array in which the  $n^{\text{th}}$  element of the array indicates  
122 the allelic value for the  $n^{\text{th}}$  locus. In SLiM, each individual's haplotype is represented with a  
123 container of mutations (where each mutation is an object that stores its position and other  
124 associated features as attributes). In SFS\_CODE, a haplotype is represented with a linked list of  
125 mutations. These different representations of the genetic variation have important consequences  
126 for the performance of the software package. Nemo's technique is expected to perform well at high  
127 genetic diversity per locus, while SLiM and SFS\_CODE are expected to perform better at low  
128 genetic diversity per locus. Nemo also has QTLs and SLiM can mimick QTLs through Eidos (the  
129 programming language used to parameterize SLiM simulations). These different representations  
130 also have consequences on the flexibility and performance of a program.

131

132 SimBit implements five different representations of the genetic variation called T1, T2, T3, T4 and  
133 T5. I refer to these representations as types of loci. T1, T4 and T5 types of locus represent binary  
134 loci. SimBit has multiple representations of binary loci in order to sustain flexibility and high  
135 performance over a wide range of genetic diversity and of simulation scenarios. T2 type of locus

136 represents blocks that count mutations, T3 type of locus represent QTLs and all three types. More  
137 information on these five types of representations is below. Loci of different types are integrated  
138 on the same recombination map. The recombination rate can be specified between any pair of  
139 adjacent loci (whether the two loci are of the same type or not) with any number of chromosomes.  
140 Mutation rates can also be set independently for each locus.

141 For a number of types of loci (see below), SimBit can make use of an assumption about the  
142 selection scenario that can provide substantial improvement in run time. I call this assumption the  
143 “multiplicative fitness” assumption. The multiplicative fitness assumption assumes 1)  
144 multiplicative fitness interactions among loci and 2) that the fitnesses of the three possible  
145 genotypes at a given locus are 1,  $1-s$  and  $(1-s)^2$ . When a user makes this assumption, SimBit  
146 partitions a haplotype into blocks and computes the fitness value for each block. If, during  
147 reproduction, no recombination events happen within a given block, then SimBit will not need to  
148 recompute the fitness for this specific block as the fitness of the block can simply be multiplied by  
149 the fitness of the same block on the other haplotype. By default, SimBit attempts to estimate the  
150 optimal size of these blocks, but a user can also explicitly specify the position and location of each  
151 block. This technique yields substantial performance improvement in terms of CPU time especially  
152 when the recombination rate within blocks is relatively low (see ‘Performance’ section below).  
153 Therefore, unless the exact dominance relationship is of central importance, it is generally  
154 recommended to make use of this assumption.

155  
156 The genetic architecture can be set independently for each species and all the selection scenarios  
157 presented below can be set differentially for each species, habitat and time. By default, all of the  
158 patches belong to the same habitat, but a user can assign each patch to a specific habitat and all the



159 selection pressures described below (including epistasis) can be specified for each habitat  
160 independently. Also, selection can be applied on viability and/or on fertility.

161

### 162 *T1 loci*

163 T1 loci track binary variables (e.g., mutated vs wildtype). SimBit has in memory for each  
164 haplotype an array of bits of the length of the number of T1 loci simulated. The  $n^{\text{th}}$  bit indicates  
165 whether the  $n^{\text{th}}$  T1 locus of this haplotype is mutated or not. As such, T1 loci are somewhat similar  
166 to Nemo's genetic representation. T1 loci have high performance for simulations with very high  
167 per locus genetic diversity.

168 Selection scenarios on T1 loci are extremely flexible. A user can set the fitness values of each of  
169 the three possible genotypes at each locus allowing for any kind of dominance scenario including  
170 overdominance and underdominance. Any epistatic interactions between any number of loci can  
171 also be specified. A user can also use the assumption of "multiplicative fitness" on T1 loci.

172

### 173 *T2 loci*

174 T2 loci are meant to represent aggregate blocks of loci, and, SimBit counts the number of mutations  
175 happening in this block. This type should be used only when 1) the genetic diversity per T2 locus  
176 is very high, 2) when performance is a major concern, 3) the user is satisfied with the limited  
177 selection scenario it can model, and 4) a simple count of the number of mutations happening per  
178 T2 locus for each haplotype is a sufficient output. Selection on T2 is forced to have multiplicative  
179 effect among haplotypes (therefore T2 loci always use the assumption of "multiplicative fitness").

180

181

182 *T3 loci*

183 T3 loci are quantitative trait loci (QTL) and code for an  $n$ -dimensional phenotype. The user can  
184 set the phenotypic effect of each T3 locus on each of the  $n$  axes of the phenotype, and these  
185 phenotypic effects can also depend on the environment in order to simulate a plastic response. A  
186 user can also add random developmental noise (drawn from a Gaussian distribution) in the  
187 production of a phenotype in order to reduce heritability. For T3 loci, the user can define a fitness  
188 landscape, where an individual's fitness is given by its phenotype.

189

190 *T4 loci*

191 For T4 loci, SimBit computes the coalescent tree of the population over time and adds the  
192 mutations onto the tree when the user asks for output. As a consequence, T4 loci are necessarily  
193 neutral. T4 loci are inspired from Kelleher et al. (2018) and the method has already been  
194 implemented in SLiM (Haller et al., 2019). Tree recording technics can be very promising when  
195 dealing with lots of highly linked neutral loci. This technic allows a forward-in-time simulator to  
196 perform equally than backward-in-time simulators for some extreme simulation scenarios while  
197 retaining many of the advantages of forward-in-time simulations such as simulating selection at  
198 other loci (Haller et al., 2019).

199

200 *T5 loci*

201 T5 loci are very similar to T1 loci (two simulations with the same random seed differing only by  
202 the fact that one uses T1 loci and the other uses T5 loci will produce the same output). For each  
203 haplotype, SimBit has a dynamic sorted array with the position of each T5 locus that is mutated.  
204 As such T5 loci are somewhat similar to how SLiM keeps track of its genetic architecture. With

205 high genetic diversity SimBit therefore tracks a lot of mutated loci, while with low genetic diversity  
206 SimBit tracks few mutated loci. For this reason, T5 loci tend to perform better than T1 loci for  
207 moderate to low genetic diversity per locus.

208 Behind the scene, SimBit will track separately T5 loci that are under selection and T5 loci that are  
209 neutral for improved performance. SimBit can also compress T5 loci (either the neutral ones and/or  
210 the selected ones) information in memory. Compression reduces the RAM usage by up to a factor  
211 of 2 and can increase or decrease CPU time depending on the simulation scenario. By default,  
212 SimBit makes this compression on the neutral T5 loci only and only when it is certain it will  
213 improve performance. For advanced users, it is also possible to ask SimBit to invert the meaning  
214 of some loci depending on their frequencies. For example, if the locus 23 is fixed or quasi-fixed,  
215 haplotypes would track this 23<sup>rd</sup> locus only if they carry the non-mutated allele.

216 With T5 loci, one can specify the fitness values of the heterozygote and double mutants' genotypes  
217 only allowing for all types of dominance including overdominance and underdominance. Just as  
218 on T1 loci (and T2 loci), a user can take advantage of the assumption of "multiplicative fitness".

219

## 220 **Initialization**

221 Several options exist in SimBit to initialize and reset the genome of existing individuals. The patch  
222 size as well as the genetic diversity for each locus can be set at initialization. A user can then  
223 perform any mutation desired at predefined times with the option `--resetGenetics`. To ease user  
224 interface, SimBit also allows the user to define "individual types" (via option `--individualTypes`).  
225 Those individual types can then be used to either initialize a population or to insert (or replace)  
226 new individuals into any patch at arbitrary moments (also via option `--resetGenetics`). One can, for  
227 example, create individual types belonging to large hypothetical patches and simulate immigration

228 from these hypothetical patches by just introducing these individual types into the focal patch. This  
229 speeds up simulations as SimBit does not explicitly simulate these large source patches.  
230 It is also possible to start a simulation from the individuals of a previous simulation that have been  
231 saved in binary files. Binary files are particularly useful to 1) avoid simulating a burn-in multiple  
232 times, 2) resume a simulation from an intermediate timepoint, and 3) save the entire population in  
233 a compact format to extract specific summary statistics later on.

234

## 235 **Outputs**

236 Outputs are often very limiting factors for population genetic simulators (Hoban et al., 2012).  
237 SimBit can produce 30 different types of outputs (which can be sampled at any number of  
238 generations throughout the simulation). These outputs include, but are not limited to, entire  
239 genotypes of each individual in the metapopulation, allele frequencies,  $F_{ST}$ , VCF files, fitness  
240 (specifying fitness for each type of locus), patch sizes, extinction times of the different species, the  
241 whole genealogy between two specified generations, binary files of the entire population (that can  
242 be reused for future simulations or simply to extract summary statistics later on). Many of these  
243 outputs can be restricted on a specified subset of loci. SimBit can also simulate sequencing errors  
244 before producing the outputs to make results easier to compare to empirical data.

245

## 246 **User interface**

247 SimBit reads options either directly from the command line or via an input file. An important goal  
248 of SimBit is to have a user interface that takes input that is readable and in a very simple format to  
249 give the users a good understanding of what they are simulating and offer very explicit error  
250 messages when input is nonsense. SimBit recognizes specific options as they are preceded by a

251 double dash ('--'). For example, '--patchCapacity unif 1e4' indicates that the carrying capacity is  
252 uniform (keyword 'unif') for all patches and is set to 10,000. The ordering of these options does  
253 not matter. SimBit also provides a number of macros that are mainly inspired from R functions.  
254 These inputs can be read either directly from the command line or from a file. SimBit also comes  
255 with an R wrapper.

256 In order to be fast and easy to learn, SimBit provides many functionalities with a relatively small  
257 number of options. It achieves this by having most options being specific to a generation, a habitat  
258 and/or a species and uses specific markers, @G, @H and @S to input information that are  
259 generation-specific, habitat-specific and species-specific, respectively. For example, the entry --  
260 N @G0 unif 100 @G5e3 unif 1000 asks for the carrying capacity of all patches to be  
261 uniformly (keyword unif) set to 100 from generation 0 to generation 4999 and then set to 1000  
262 until the end of the simulation. Also, most options come with a diversity of modes of data entry.  
263 For example, for the migration scenario, a user can indicate the whole dispersal matrix or can  
264 simply specify an island model, a linear stepping stone model or a Gaussian dispersal kernel.

265 Below, I benchmark SimBit in comparison to other softwares. Examples of command line inputs  
266 to SimBit for these simulations which results are shown on figures 1, 2, S1, S2, S3 and S4 as well  
267 as for the simulations of figure 3 are found in appendix A. Here is an example of a input file used  
268 for this benchmark. Please see manual for more information.

269

```
#####  
### Example of input file ###  
#####  
  
### Number of patches  
--PatchNumber 1  
  
### Carrying capacity  
--N unif 1e5  
  
### Genetic architecture. Asks for 60000 T5 loci  
--Loci T5 6e4  
  
### Mutation rate on T5 loci  
--T5_mu unif 1e-7  
  
### Selection (uses multfit assumption)  
--T5_fit multfitUnif 0.99999  
  
### Recombination rate  
# Values are interpreted as a "rate".  
# For centimorgan, use "cM", instead of "rate"  
--r rate unif 1e-7  
  
### Number of generations  
--nbGens 1e5
```

270

271

272 SimBit also comes with an R wrapper that is particularly useful for building numerous input  
273 simulations. Without going into explaining the detail working of the wrapper, let's consider a  
274 complete example of code that will test how different migration rates and number of patches in an  
275 island model affect  $F_{ST}$ . The first step is to create a grid of parameters (a "data.frame"), where each  
276 row contains information for a single simulation. We will use a full factorial design with three  
277 distinct migration rates and seven distinct number of patches. We will run 20 replicates for each  
278 of these  $3 \times 7 = 21$  combinations resulting in a grid of parameters of 420 rows. The argument

279 “outputFilePrefix” sets a column called “outputFile” with the prefix given followed by the row  
280 number. This column will be used to set the where outputs should be directed.

```
#####  
## Load SimBitWrapper ##  
#####  
  
# devtools::install_github("RemiMattheyDoret/SimBitWrapper")  
require(SimBitWrapper)  
  
#####  
## Create grid of parameters ##  
#####  
  
parameterGrid = fullFactorial(  
  PatchNumber = c(2,3,4,5,6,7,8),  
  migrationRate = c(0.001, 0.003, 0.01),  
  N = 1e3,  
  nbLoci = 1e4,  
  nbGenerations = 5e4,  
  recRate = 1e-4,  
  mu = 1e-5,  
  replicate = 1:20,  
  outputFilePrefix = "/Users/Remi/mySims/output_"  
)
```

281  
282  
283 The second step is to loop through the rows of the parameter grid in order to run the simulations  
284 (or to create the input file to run them later on). For this, we use the function  
285 GetParameterGridData, which, for each column of the grid of parameters, sets a variable  
286 with name equal to the column name and value equal to the value of this column at the specified  
287 row of the specified parameter grid given in input.

```
#####  
## Create inputs and run simulations ##  
#####  
  
for (row in 1:nrow(parameterGrid))  
{  
  ### Get data for the row  
  GetParameterGridData(parameterGrid, row)  
  
  ### Initialize the input  
  input = Input$new()  
  
  ### Set the values  
  input$set("PatchNumber", PatchNumber)  
  input$set("m","island", migrationRate)  
  input$set("N", "unif", N)  
  input$set("nbGenerations", nbGenerations)  
  input$set("L", "T1", nbLoci)  
  input$set("T1_mu", "unif", mu)  
  input$set("r", "rate", "unif", recRate)  
  input$set("T1_FST_file", outputFile, nbGenerations)  
  
  ### Run the simulation  
  input$run(maxNbThreads=24)  
}
```

288

289

290 The argument `maxNbThreads` is an easy way to parallelize the simulations.

291 `maxNbThreads=24` does not mean that a given simulation will use 24 threads (each simulation

292 takes one thread) but that the `run` method will start 24 simulations in the background and will

293 then wait that one of them finishes before starting a 25<sup>th</sup> simulation. Please see manual for further

294 information about the `run` method. It is sometimes more practical to print the input command into

295 a file either and run the simulations from the shell at a later time. This can be achieved with

296 `input$print("/path/to/input.txt")`. Finally, the last step is to gather the outputs and

297 graph the results. In order to gather the outputs, we use the function `gatherData`. This function



298 uses a number of optional parameters (see manual) but default parameters work fine for our simple  
299 example.

```
#####  
## Gather and graph outputs ##  
#####  
  
### Gather simulation outputs  
data = gatherData(parameterGrid)  
  
### Graph  
ggplot2::ggplot(data, aes(y=FST_WeirCockerham_ratioOfAverages,  
x=PatchNumber, color=as.factor(migrationRate))) +  
stat_summary() + theme_classic()
```

300  
301 In this simple example, the entire study (defining the parameters, creating the inputs, running the  
302 simulations, gathering and graphing the results) takes 16 lines of code (16 expressions; including  
303 loading packages, excluding the curly braces; and it could be reduced to 7 lines only)! The column  
304 “FST\_WeirCockerham\_ratioOfAverages” used for plotting corresponds to Weir & Cockerham  
305 (1984) estimator of  $F_{ST}$ . The resulting graph is displayed in figure S5 on which is added the  
306 theoretical expected  $F_{ST}$  values from Charlesworth (1998) for comparison.

### 307 308 **Program comparison – Performance**

309 It is often hard for a user to know which program to use for a given study. Indeed, few articles  
310 compare program’s features (but see Hoban, 2014, who compares software flexibility), and when  
311 authors publish a new program, they do not always compare its performance to other similar  
312 programs (but see performance comparisons between SLiM, SFS\_CODE and fwdpp in Haller &  
313 Messer, 2017).

314

315 In this article, I compared performance of SimBit to three forward-in-time programs; SFS\_CODE  
316 ([Hernandez, 2008](#); [Hernandez & Uricchio, 2015](#)), SLiM (Haller et al., 2019; Haller & Messer,  
317 2017, 2019; Messer, 2013) and Nemo (Guillaume & Rougemont, 2006). I chose these three  
318 programs because they are all forward-in-time simulation platforms, they can all simulate  
319 selection, they are all popular (392 citations among the articles announcing SLiM, SLiM2, SLiM3  
320 and the implementation of tree recording sequences in SLiM; 127 citations for Nemo; 216 citations  
321 for SFS\_CODE; as of 23rd April 2020 on Google Scholar) and are generally considered the highest  
322 performing software available.

323  
324 SimBit contains a number of options that are meant to refine its performance (see section  
325 “Performance options” in the manual). In practice though, most users will probably only need to  
326 choose the type of loci to simulate, and SimBit will do a decent job to figure out how best to  
327 simulate it. In order to best represent the performance that a new user ought to expect from SimBit,  
328 however, all simulation performances (CPU time and memory usage) presented below are made  
329 with the default parameters of SimBit.

330  
331 In order to compare program performance, I ran basic simulations with a single Wright-Fisher  
332 population, uniform mutation rate and a uniform recombination rate. All loci experienced a  
333 selection coefficient of  $s=0.00001$  and  $h=0.5$ . Low selection coefficients were chosen to 1) prevent  
334 any software from throwing an error stating that it might suffer from round-off errors caused by  
335 low mean fitness and 2) reduce the effects of assuming multiplicative fitness among haplotypes on  
336 the simulated scenario (fitness differences between simulations that take advantage of the  
337 assumption of multiplicative fitness and the ones that do not is of the order of  $10^{-11}$ ). Note that

338 while SimBit can take advantage of this assumption of multiplicative fitness on demand,  
339 SFS\_CODE is forced to make this assumption and Nemo and SLiM cannot take advantage of this  
340 assumption. I varied the mutation rate (taking values  $10^{-7}$ ,  $10^{-5}$  and  $10^{-3}$  per locus), the  
341 recombination rate (taking values 0,  $10^{-9}$  and  $10^{-7}$  and  $10^{-5}$  per adjacent locus), the carrying capacity  
342 (taking values  $10^2$ ,  $10^3$ ,  $10^4$ ,  $10^5$  and  $10^6$  diploid individuals), and the number of loci (taking values  
343 6,  $6 \times 10^2$ ,  $6 \times 10^4$  and  $6 \times 10^6$ ) in a full factorial design. All simulations ran for 10,000 generations. I  
344 ran these simulations with Nemo (version 2.3.46), SLiM (version 3.1), SFS\_CODE (version  
345 20150910) and SimBit (version 4.11.0). Because using Nemo's full potential is not trivial, for  
346 Nemo, the input files used for these benchmarks were directly created by Frederic Guillaume. In  
347 order to compare the behaviour of different types of loci and selection scenarios in SimBit, I ran  
348 all simulations four times in SimBit with T1 and T5 types of loci with and without making use of  
349 the assumption of multiplicative fitness among haplotypes. CPU time and peak in Resident Set  
350 Size (RSS; memory) usage are reported. Simulations that exceeded 10 days (240 hours) of  
351 simulation time or 20GB of memory usage were killed and are reported below with a dot at 240  
352 hours ( $8.64 \times 10^5$  seconds in the units used on the figures) and at 20GB ( $2 \times 10^7$  kb in the units  
353 used on the figures). All these simulations were run on an Intel Xeon X5650 processor and codes  
354 were compiled with gcc-4.8.2rev203690. I ensured that the number of SNPs were not significantly  
355 different between all four programs for three of the simulation scenarios benchmarked.  
356 For brevity and because changing the recombination rate has very little effect on the results (only  
357 SFS\_CODE appears to significantly slow down with higher recombination rates), I am showing  
358 only the recombination rate  $10^{-7}$  and only the carrying capacities  $10^3$ ,  $10^4$  and,  $10^5$  in the main  
359 figures. The other benchmarks are found in supplementary material. Figure 1 compares the CPU  
360 time among SimBit simulations (T1 vs. T5 and with vs. without taking advantage of the

361 assumption of multiplicative fitness among haplotypes) for a subset of scenarios. Figure S1 and  
362 S2 compare, respectively, the CPU time and the memory usage among SimBit simulations for all  
363 scenarios. Figure 2 compares CPU time among Nemo, SLiM, SFS\_CODE and SimBit for a subset  
364 of scenarios. Figure S3 and S4 compare, respectively, the CPU time and the memory usage among  
365 Nemo, SLiM, SFS\_CODE and SimBit.  
366

367 **Figure 1:** Comparison of computational time among the four different ways to simulate the same  
368 evolutionary scenario using SimBit. Results here are only for a subset of parameters (excluding  
369  $N=100$ ,  $N=10^6$  and all scenarios where the recombination rate among adjacent loci differs from  
370  $10^{-7}$ ). Other scenarios are in figure S1. Comparisons of memory usage (max Resident Set Size) are  
371 found in figure S2. Simulations that exceeded 10 days (240 hours) of simulation time or 20GB of  
372 memory were killed and are reported below with an empty dot at 240 hours ( $8.64 \times 10^5$  second).  
373 The bold **M** signifies the usage of the assumption of multiplicative fitness.

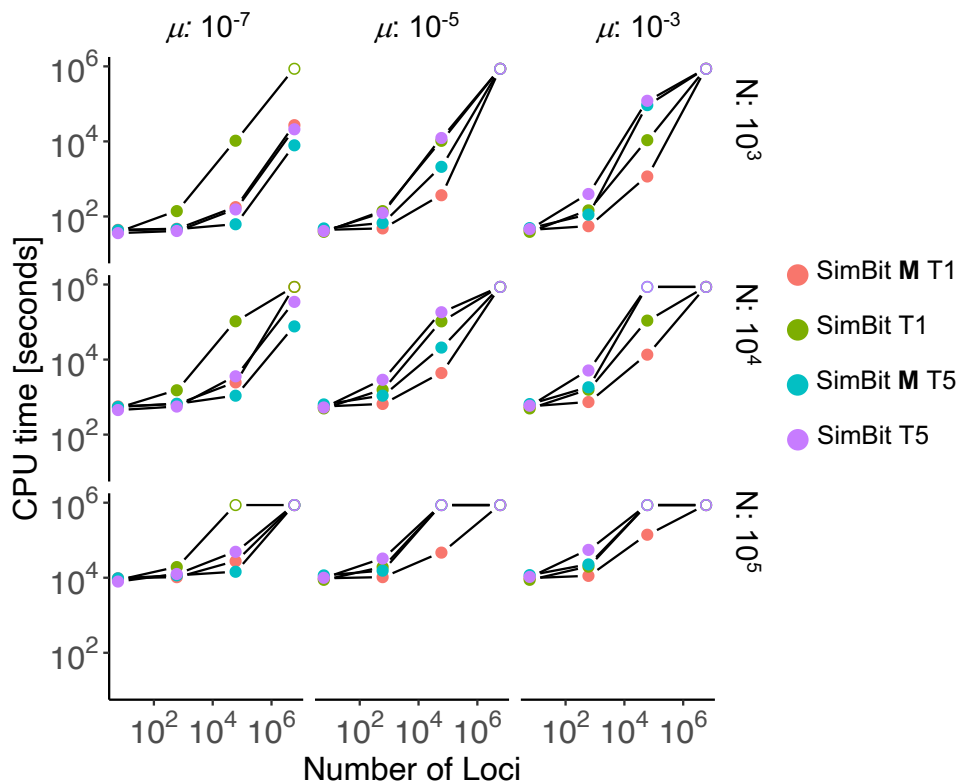

374

375

376

377 As expected, T1 loci perform best at high per locus genetic diversity, while T5 loci perform best  
378 at moderate to low per locus genetic diversity (figure 1). This is because with T5 loci, SimBit  
379 tracks the mutated loci, while with T1 loci, SimBit tracks every locus whether mutated or not (see  
380 above section “Representations of the genetic architecture”).

381 Simulations taking advantage of the assumption of multiplicative fitness generally performed  
382 better. This advantage decreases as recombination gets higher. For the range of recombination  
383 rates explored (up to  $10^{-5}$  among adjacent loci), simulations taking advantage of the assumption of  
384 multiplicative fitness always outperformed the simulations that did not make this assumption. The  
385 reason why recombination rate matters for performance is because, as explained in section “Types  
386 of loci and selection”, SimBit needs to recompute fitness for a fitness block only if a recombination  
387 event happens within this block when using the multiplicative fitness assumption.

388

389

390 **Figure 2:** Comparison of computational time among the four different simulation programs Nemo,  
391 SFS\_CODE, SLiM and SimBit. For SimBit, two lines are displayed showing the best performing  
392 between T1 and T5 loci from figure 1, once taking advantage of the assumption of multiplicative  
393 fitness, once without taking advantage of this assumption. For comparison, SLiM and Nemo are  
394 unable to take advantage of this assumption while SFS\_CODE is forced to make this assumption.  
395 Other scenarios are in figure S3. Comparisons of memory usage (max Resident Set Size) are found  
396 in figure S4. See figure 1 for more details.  
397

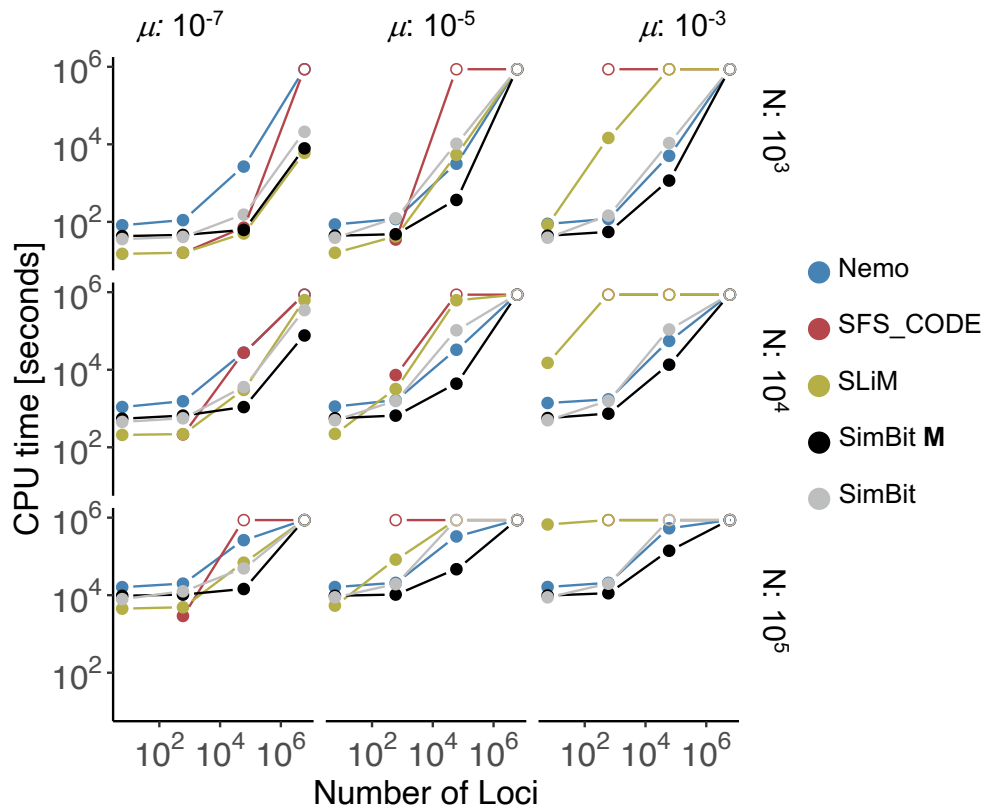

398

399

400 Comparisons between different programs highlight that there is no one program that always  
401 performs best (figure 2; figure S3). However, unlike all other software tested, SimBit perform  
402 highly in all simulation scenarios considered. SFS\_CODE's CPU time and peak RSS increases  
403 exponentially with increase in mutation rate and population size (see also simulations performed  
404 by the Ryan Hernandez on SFS\_CODE websites;  
405 [sfscode.sourceforge.net/SFS\\_CODE/Performance.html](https://sfscode.sourceforge.net/SFS_CODE/Performance.html)). Hence, SFS\_CODE performs well for  
406 simulations that have very low genetic diversity, but it quickly becomes very slow as genetic  
407 diversity increases.

408 Nemo is most competitive when there is high genetic diversity per locus (high mutation rate and  
409 high population size). This was expected because Nemo tracks every single locus for each  
410 haplotype whether or not it is mutated. In fact, with high genetic diversity, Nemo sometimes runs  
411 in less time than SimBit when SimBit did not take advantage of the multiplicative fitness  
412 assumptions (the grey dots in figures 2 and S3). Nemo never outperformed SimBit in terms of  
413 memory usage though (Figure S4) or in terms of CPU time when SimBit takes advantage of the  
414 multiplicative assumption.

415 SLiM, just like SFS\_CODE, performs best at very low genetic diversity. SLiM computational time  
416 is however not as exponential as SFS\_CODE, which makes SLiM fast for a wider range of  
417 simulation scenarios. SLiM tends to perform better than SimBit when there is little genetic  
418 diversity, while SimBit tends to perform better when there is moderate to high genetic diversity.  
419 In general, performance comparison in terms of memory usage (figures S2, S4) mirrors well the  
420 performance comparisons in terms of CPU time (figures S1, S3).

421 A difference in performance is not just a question of whether a user will have to wait a little longer  
422 to get their output; often it is the difference between a research project that is feasible or not. The



423 log scale on figures S1 and S2 (and supp. figures) might give the reader a false impression of the  
424 importance of an observed difference. Consider for example the simulation scenario where  $r=10^{-7}$ ,  
425  $N=10^3$ ,  $\mu=10^{-7}$  and 6 loci where SLiM outperforms SimBit. SLiM runs in 16 seconds while  
426 SimBit runs in 37 seconds. Let's now consider the simulation scenario where  $r=10^{-7}$ ,  $N=10^5$ ,  $\mu=10^{-7}$   
427 and  $6 \times 10^4$  loci. SimBit (with multiplicative fitness assumption) runs in ~4 hours, while SLiM  
428 runs in ~19 hours, Nemo runs in more than 3 days and SFS\_CODE does not manage to finish  
429 within the 10-day limit. To further consider comparisons between SLiM and SimBit as example,  
430 from figure 2, the simulation scenario where SLiM is comparably the fastest, SLiM is 2.56 times  
431 faster than SimBit; SimBit took 41 seconds while SLiM took only 16 seconds. For the simulation  
432 scenario where SimBit is comparably the fastest, SimBit is (at least) 1169 times faster than SLiM;  
433 SimBit took ~12.3 minutes while SLiM was killed after overpassing the 240 hours walltime. These  
434 performance differences can translate into a major determinant of what can be achieved for a  
435 research project.

436  
437 These very simple simulation scenarios benchmarked above might not be representative of what  
438 people really want to simulate. I therefore performed further benchmarking by comparing the  
439 performance of Nemo, SLiM, SFS\_CODE and SimBit for simulations inspired by recent papers.  
440 I sampled three papers, one that performed simulations with SFS\_CODE (O'Neill et al., 2019),  
441 one that performed simulations with Nemo (Gilbert et al. 2017) and one that performed simulations  
442 with SLiM (Booker & Keightley, 2018). To simplify the writing of the commands and make sure  
443 that the comparison is fair, I simplified the Booker and Keightley (2017) simulations by assuming  
444 a constant mutation rate and recombination rate and used the gamma distribution of fitness effects  
445 with a mean of 0.05 and an alpha parameter of 0.111. For the Gilbert et al. (2017) paper, the

446 simulations have also been slightly modified from the original. The original paper's specified a  
447 "breeding kernel" that can only run on a modified version of Nemo that is not directly published  
448 on Nemo's official website. Hence, for the Gilbert et al. (2017) simulation, I removed the  
449 `breeding_kernel` and modified the size of the dispersal kernel appropriately. For simplicity  
450 (because the original input file was 390Mb large), I also used a linear stepping stone model of  
451 8000 patches starting with the 1000 left-most patches at carrying capacity and the others empty. I  
452 made sure the expansion speed was similar among the two programs. For fairness, I compared the  
453 Nemo and SLiM that cannot take advantage of the assumption of multiplicative fitness with SimBit  
454 that does not make this assumption, while I compared SFS\_CODE that is forced to make this  
455 assumption with SimBit that makes this assumption. I also performed a benchmark inspired from  
456 human genome and human ancestral demography. I simulate 500 patches of 100 individuals each  
457 in a linear stepping stone model with a migration rate to either of the two neighboring patch of 0.2.  
458 The genome contained  $2 \times 10^8$  sites with a uniform mutation rate of  $2 \times 10^{-8}$  and a uniform  
459 recombination rate of  $10^{-8}$ . For simplicity, all loci were under purifying selection with a constant  
460 selection coefficient of 0.0001 and a dominance coefficient of 0.5. Finally, I added a benchmark  
461 of a simple Wright-Fisher simulation scenario ( $N=1000$ ,  $\mu=10^{-5}$ ,  $10^6$  loci,  $r=0$ ; 5000 generations)  
462 without selection. Neutral loci can be tracked through a coalescent tree for both SLiM (with Tree  
463 Recording and subsequent analysis of the outputted binary file in Python) and SimBit (with T4  
464 loci). These simulations were run on an Intel i7-8559u processor, and codes were compiled with  
465 clang-800.0.42.1.

466 SimBit systematically outperforms the software used in the original papers (figure 3). For the  
467 simulation inspired from human genetics and ancestral human population, SimBit outperformed  
468 SLiM whether it made use of the multiplicative fitness assumption or not. Finally, for the "Neutral

469 simulation example”, the coalescent tree recording technique of both SLiM and SimBit vastly  
470 outperform more traditional techniques (figure 3). With “traditional techniques”, SLiM, Nemo and  
471 SimBit took 8m29s, 4m05s and 1m18s, respectively, while using coalescent tree recording  
472 methods, SLiM and SimBit only took 16.6 seconds and 1.2 seconds, respectively. Here, I only  
473 considered an extreme scenario to exemplify the possible advantage of tree recording techniques.  
474 For example, I used a recombination rate of zero. With higher recombination rates, the  
475 computational time of tree recording techniques would become slower, while it would not have  
476 much impact on the runs that did not use a tree recording technique.  
477

478 **Figure 3:** Comparison of CPU time among the four programs to reproduce simulations inspired  
479 from three recent papers as well as for a neutral simulation scenario with extreme parameters  
480 chosen to highlight the possible advantage of T4 loci (Tree recording). The bold **M** signifies the  
481 use of the assumption of multiplicative fitness. SFS\_CODE simulation from the “Neutral  
482 simulation example” as well as both SFS\_CODE and Nemo simulations from the “Human  
483 ancestral populations” were purposely killed after overpassing 50 times SimBit’s CPU time for  
484 the same simulation.

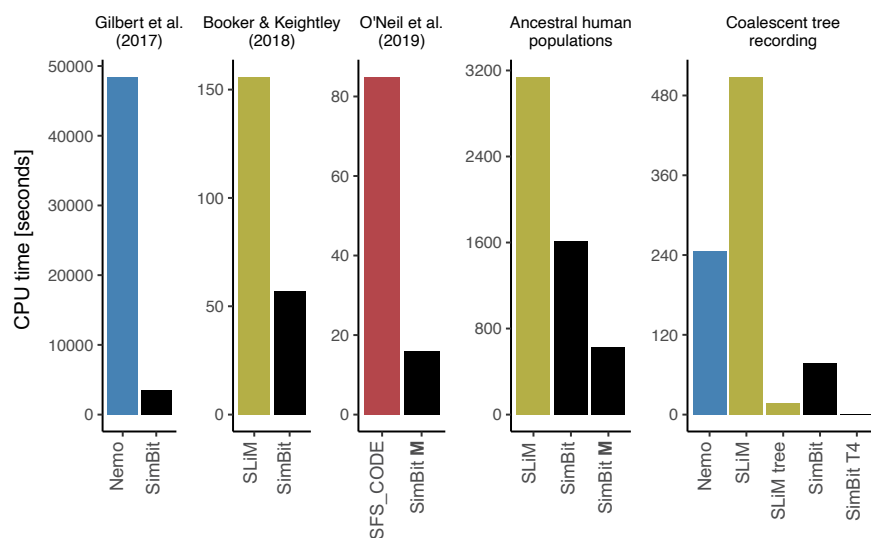

485

## 486 Conclusion

487 There is no perfect way to compare program performance, and one must always be careful when  
488 making conclusions from such a benchmark. First, the parameter space considered is, of course,  
489 finite. For example, my benchmark does not include any single-locus simulations, simulations with  
490 high selfing rates or with males and females instead of hermaphrodites, or any simulations with a  
491 very high recombination rate. Also, different programs mean different things by a locus.  
492 SFS\_CODE simulate triplets of loci as a codon. This means that many mutations that are  
493 happening in SFS\_CODE are synonymous mutations that don't affect fitness. Consequently, the

494 performance comparisons shown here are unfairly favourable to SFS\_CODE compared to Nemo,  
495 SLiM and SimBit, but it would not be any fairer either to run all SFS\_CODE simulations with  
496 three times as many loci. Nemo uses a byte to represent each neutral locus (but only a single bit  
497 for loci under selection) hence allowing for the representation of up to 256 possible alleles at  
498 neutral loci. SimBit on the other hand represent each locus with a single bit (whether the locus is  
499 under selection or not), hence allowing for only two possible alleles. SLiM's mutations "stack"  
500 (no reverse mutations) at a given locus, hence simulating a pseudo infinite allele type of model  
501 (see SLiM manual on "mutation stacking" for more information;  
502 [http://benhaller.com/slim/SLiM\\_Manual.pdf](http://benhaller.com/slim/SLiM_Manual.pdf)). As explained above, SimBit contains a number of  
503 performance tweaks a user can take advantage of to improve the performance above the default  
504 run mode (compression of T5 data in memory, allowing inversion of the meaning of T5 loci  
505 depending on their frequency, turning on/off the swapping of pointers for haplotypes that do not  
506 recombine or mutate during reproduction, setting manually the positions of blocks for the  
507 multiplicative fitness assumption). However, the above simulations were all performed with  
508 SimBit default values for these performance tweaks, which is somewhat unfair to SimBit.  
509  
510 SimBit has already been used in a number of projects. It has been used for simulations that require  
511 very high performance, simulating the effect of background selection of large stretch of DNA in  
512 structured populations (Matthey-Doret & Whitlock, 2019). SimBit has also been used for two  
513 projects on genetic rescue, one requiring habitat-specific epistatic interactions (Nietlisbach et al.,  
514 forthcoming) and one requiring complex metapopulation initialization and introduction of  
515 predefined individuals during the simulation (Whitlock lab consortium, forthcoming). SimBit is

516 under a permissive free program license and is available at  
517 <https://github.com/RemiMattheyDoret/SimBit>.

518

## 519 **Acknowledgment**

520 Thank you to Michael C. Whitlock for his help through discussions in designing SimBit. Thank  
521 you to both Michael C. Whitlock and Kimberly J. Gilbert for helpful comments on the manuscript.  
522 Thank you to Pirmin Nietlisbach for being the main beta tester and for his advice on how to  
523 improve the user interface and the manual. Thank you also to Ben Haller and Frédéric Guillaume  
524 for their feedback on how to make a fair comparison among programs. Special thanks to Frédéric  
525 Guillaume for his help at creating the input files for Nemo and for his feedback about how to  
526 display the benchmark results in a way that is fair. Finally, thank you to ComputeCanada for the  
527 computational resources used for benchmarking.

528

## 529 **Funding**

530 The work was partially funded by a Swiss National Science Foundation (SNF) Doc.Mobility  
531 fellowship P1SKP3\_168393 and partially funded by Natural Science and Engineering Research  
532 Canada (NSERC) Discovery Grant RGPIN-2016-03779.

533

- 534 Beaumont, M. A. (2010). Approximate Bayesian Computation in Evolution and Ecology. *Annual*  
535 *Review of Ecology, Evolution, and Systematics*, 41(1), 379–406.  
536 <https://doi.org/10.1146/annurev-ecolsys-102209-144621>
- 537 Booker, T. R., & Keightley, P. D. (2018). Understanding the Factors That Shape Patterns of  
538 Nucleotide Diversity in the House Mouse Genome. *Molecular Ecology*, 18.  
539 <https://doi.org/10.1093>
- 540 Çelik, C., & Duman, O. (2009). Allee effect in a discrete-time predator–prey system. *Chaos,*  
541 *Solitons & Fractals*, 40(4), 1956–1962. <https://doi.org/10.1016/j.chaos.2007.09.077>
- 542 Charlesworth, B. (1998). Measures of divergence between populations and the effect of forces  
543 that reduce variability. *Molecular Biology and Evolution*, 15(5), 538–543.  
544 <https://doi.org/10.1093/oxfordjournals.molbev.a025953>
- 545 Cowley, D. E. (2008). Estimating required habitat size for fish conservation in streams. *Aquatic*  
546 *Conservation: Marine and Freshwater Ecosystems*, 18(4), 418–431.  
547 <https://doi.org/10.1002/aqc.845>
- 548 Gilbert, K. J., Sharp, N. P., Angert, A. L., Conte, G. L., Draghi, J. A., Guillaume, F., Hargreaves,  
549 A. L., Matthey-Doret, R., & Whitlock, M. C. (2017). Local Adaptation Interacts with  
550 Expansion Load during Range Expansion: Maladaptation Reduces Expansion Load. *The*  
551 *American Naturalist*, 189(4), 368–380. <https://doi.org/10.1086/690673>
- 552 Guillaume, F., & Rougemont, J. (2006). Nemo: An evolutionary and population genetics  
553 programming framework. *Bioinformatics*, 22(20), 2556–2557.  
554 <https://doi.org/10.1093/bioinformatics/btl415>

- 555 Haller, B. C., Galloway, J., Kelleher, J., Messer, P. W., & Ralph, P. L. (2019). Tree-sequence  
556 recording in SLiM opens new horizons for forward-time simulation of whole genomes.  
557 *Molecular Ecology Resources*, 19(2), 552–566. <https://doi.org/10.1111/1755-0998.12968>
- 558 Haller, B. C., & Messer, P. W. (2017). SLiM 2: Flexible, Interactive Forward Genetic  
559 Simulations. *Molecular Biology and Evolution*, 34(1), 230–240.  
560 <https://doi.org/10.1093/molbev/msw211>
- 561 Haller, B. C., & Messer, P. W. (2019). SLiM 3: Forward Genetic Simulations Beyond the  
562 Wright–Fisher Model. *Molecular Biology and Evolution*, 36(3), 632–637.  
563 <https://doi.org/10.1093/molbev/msy228>
- 564 Halls, A. S., & Welcomme, R. L. (2004). Dynamics of river fish populations in response to  
565 hydrological conditions: A simulation study. *River Research and Applications*, 20(8),  
566 985–1000. <https://doi.org/10.1002/rra.804>
- 567 Hernandez, R. D. (2008). A flexible forward simulator for populations subject to selection and  
568 demography. *Bioinformatics*, 24(23), 2786–2787.  
569 <https://doi.org/10.1093/bioinformatics/btn522>
- 570 Hernandez, Ryan D., & Uricchio, L. H. (2015). *SFS\_CODE: More Efficient and Flexible*  
571 *Forward Simulations* [Preprint]. Bioinformatics. <https://doi.org/10.1101/025064>
- 572 Hoban, S. (2014). An overview of the utility of population simulation software in molecular  
573 ecology. *Molecular Ecology*, 23(10), 2383–2401. <https://doi.org/10.1111/mec.12741>
- 574 Hoban, S., Bertorelle, G., & Gaggiotti, O. E. (2012). Computer simulations: Tools for population  
575 and evolutionary genetics. *Nature Reviews Genetics*, 13(2), 110–122.  
576 <https://doi.org/10.1038/nrg3130>



- 577 Kelleher, J., Thornton, K. R., Ashander, J., & Ralph, P. L. (2018). Efficient pedigree recording  
578 for fast population genetics simulation. *PLOS Computational Biology*, *14*(11), e1006581.  
579 <https://doi.org/10.1371/journal.pcbi.1006581>
- 580 Matthey-Doret, R., & Whitlock, M. C. (2019). Background selection and  $F_{ST}$ : Consequences for  
581 detecting local adaptation. *Molecular Ecology*, *28*(17), 3902–3914.  
582 <https://doi.org/10.1111/mec.15197>
- 583 Messer, P. W. (2013). SLiM: Simulating Evolution with Selection and Linkage. *Genetics*,  
584 *194*(4), 1037–1039. <https://doi.org/10.1534/genetics.113.152181>
- 585 O’Neill, M. B., Shockey, A., Zarley, A., Aylward, W., Eldholm, V., Kitchen, A., & Pepperell, C.  
586 S. (2019). Lineage specific histories of *Mycobacterium tuberculosis* dispersal in Africa  
587 and Eurasia. *Molecular Ecology*, *mec.15120*. <https://doi.org/10.1111/mec.15120>
- 588 Otto, S. P., & Day, T. (2007). *A biologist’s guide to Mathematical Modeling in Ecology and*  
589 *Evolution*. Princeton University Press.
- 590 Schrider, D. R., & Kern, A. D. (2018). Supervised Machine Learning for Population Genetics: A  
591 New Paradigm. *Trends in Genetics*, *34*(4), 301–312.  
592 <https://doi.org/10.1016/j.tig.2017.12.005>
- 593 Weir, B. S., & Cockerham, C. C. (1984). Estimating F-Statistics for the Analysis of Population  
594 Structure. *Evolution*, *38*(6), 1358–1370.
- 595 Yeaman, S., & Whitlock, M. C. (2011). THE GENETIC ARCHITECTURE OF ADAPTATION  
596 UNDER MIGRATION-SELECTION BALANCE: THE GENETIC ARCHITECTURE  
597 OF LOCAL ADAPTATION. *Evolution*, *65*(7), 1897–1911.  
598 <https://doi.org/10.1111/j.1558-5646.2011.01269.x>  
599
